# Supplementary material for: Light-emitting Ti2N (MXene) quantum dots: synthesis, characterization and theoretical calculations
Source: Royal Society of Chemistry journal article supplement (doi:10.1039/d2tc00568a), 2022-01-01
Supplement: d2tc00568a1.pdf [file d2tc00568a1.pdf]

## Supporting Information

### **Light-Emitting Ti<sub>2</sub>N (MXene) Quantum Dots: Synthesis, Characterization and Theoretical Calculations**

Anir S. Sharbirin<sup>a</sup>, Shrawan Roy<sup>a</sup>, Trang Thu Tran<sup>a</sup>, Sophia Akhtar<sup>a</sup>, Jaspal Singh<sup>a</sup>, Dinh Loc Duong<sup>\*,b</sup> and Jeongyong Kim<sup>\*,a</sup>

<sup>a</sup>Department of Energy Science, Sungkyunkwan University, Suwon 16419, Korea.

<sup>b</sup>Center for Integrated Nanostructure Physics (CINAP), Institute for Basic Science (IBS), Suwon 16419, Republic of Korea.

Corresponding authors: Email: \*D.L.D (ddloc@skku.edu); J.K (j.kim@skku.edu)

#### **Table of Contents:**

1. TEM image (scale bar = 50 nm) of Ti<sub>2</sub>C MQDs.
2. Fluorescence of Ti<sub>2</sub>N MQDs dispersed in water.
3. PL-spectrum of Ti<sub>2</sub>N MQDs solution and thin film at 375-nm laser excitation. Confocal image of thin-film Ti<sub>2</sub>N MQDs at 405-nm laser excitation. Thin-film Ti<sub>2</sub>N MQDs drop casted on quartz substrate illuminated with UV (250 nm) LED.
4. Plot of Ti<sub>2</sub>N MQDs QY estimation vs. excitation energy.
5. PL intensity and QY of Ti<sub>2</sub>N MQDs in 10 days.
6. (A) PL spectra and (B) QY of Ti<sub>2</sub>N MQDs in different pH condition ranging 2 - 12.
7. (A) UV-Vis absorption spectra, (B) PL spectra and (C) QY of Ti<sub>2</sub>N MQDs with the presence of Co<sup>2+</sup> and Mn<sup>2+</sup> ions.
8. DFT calculation of Ti<sub>2</sub>NO<sub>2</sub> MQDs with sizes of 1.5 nm and 3 nm.
9. DFT calculation of Ti<sub>2</sub>N MQDs.
10. Supporting note Figure S3

## 11. Supporting note Figure S4: Measurement of QY

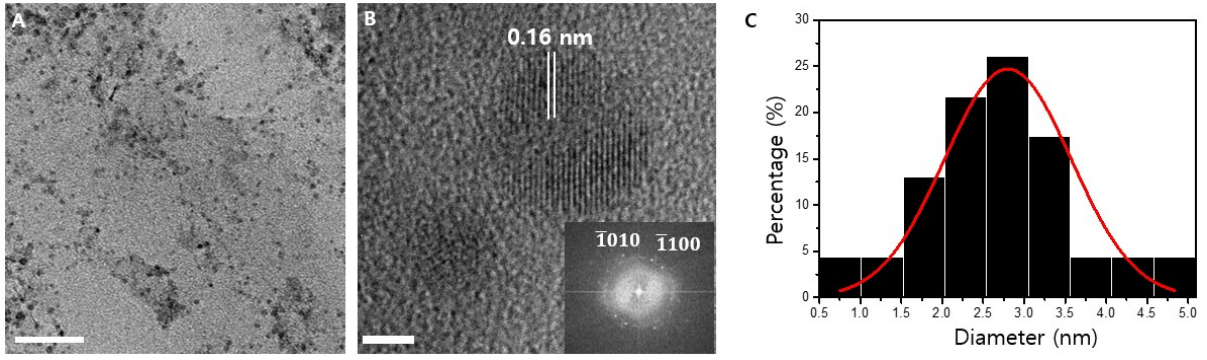

**Figure S1:** A. TEM image (scale bar = 50 nm) of  $\text{Ti}_2\text{C}$  MQDs. B. HR-TEM image (scale bar = 2 nm) of  $\text{Ti}_2\text{C}$  MQDs C. Size distribution of  $\text{Ti}_2\text{C}$  MQDs in (A). Inset of (B) is the FFT pattern of the corresponding HR-TEM image

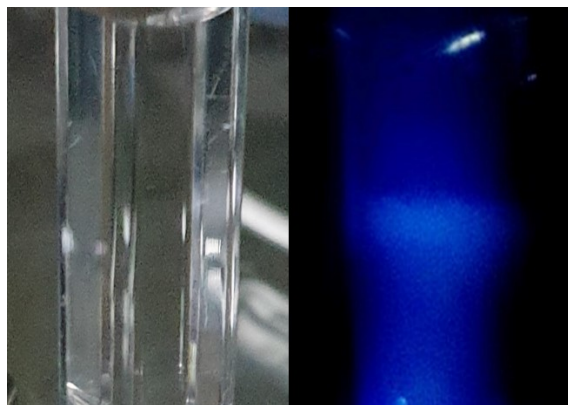

**Figure S2:** Fluorescence of  $\text{Ti}_2\text{N}$  MQDs dispersed in water. The MQDs showed blue emission when illuminated with UV (250 nm) LEDs.

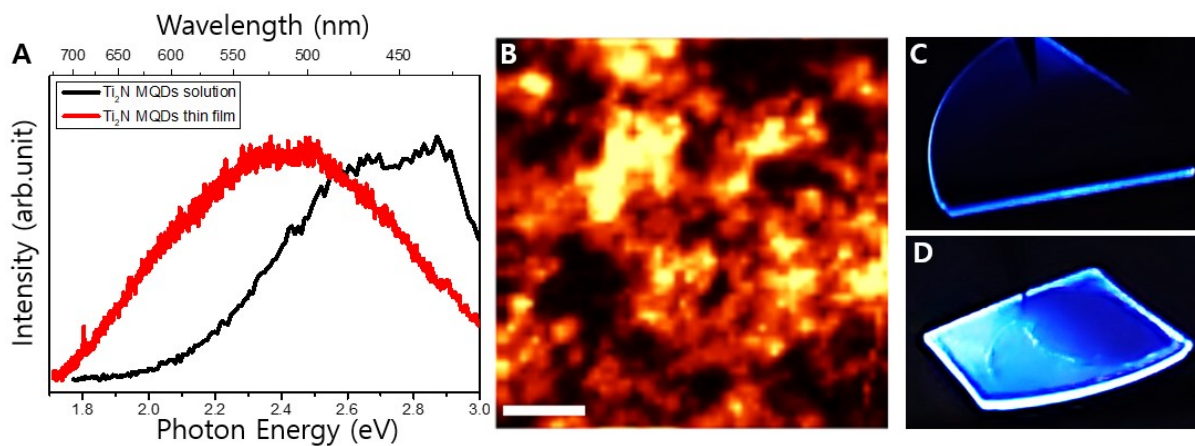

**Figure S3:** A. PL-spectrum of  $\text{Ti}_2\text{N}$  MQDs solution (black) and thin film (red) at 375-nm laser excitation B. Confocal image (scale bar = 5  $\mu\text{m}$ ) of thin-film  $\text{Ti}_2\text{N}$  MQDs at 405-nm laser excitation. C. Blank quartz substrate illuminated with UV (250 nm) LED D. Thin-film  $\text{Ti}_2\text{N}$  MQDs drop casted on quartz substrate illuminated with UV (250 nm) LED.

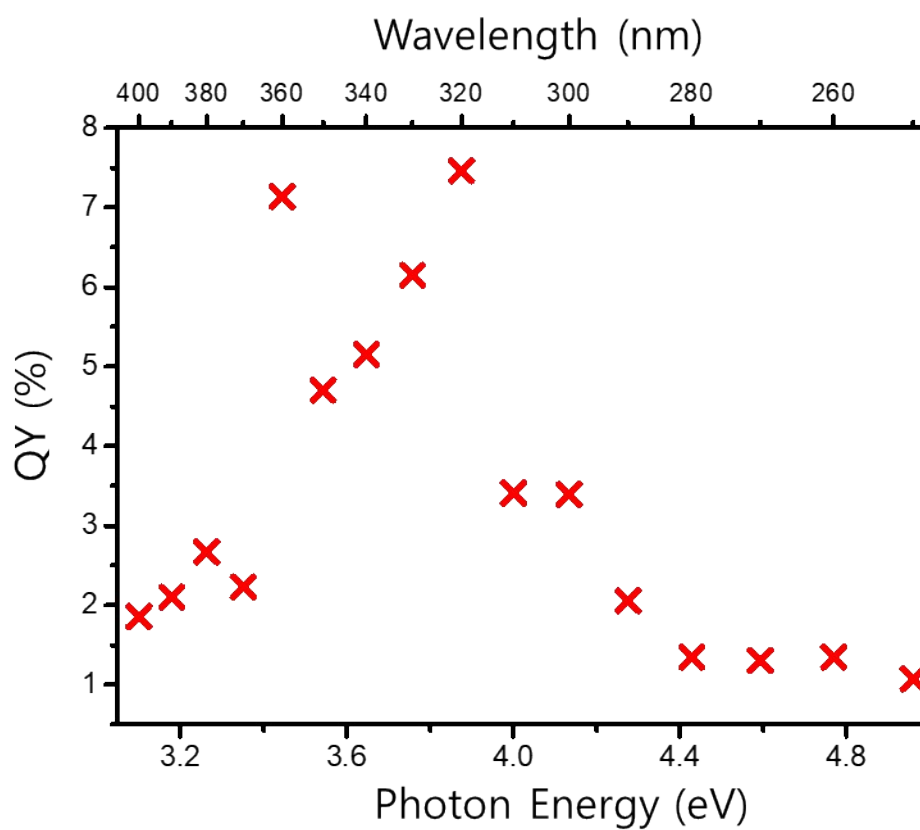

**Figure S4:** Plot of  $\text{Ti}_2\text{N}$  MQDs QY estimation vs. excitation energy (ranging from 250–400 nm wavelength excitation)

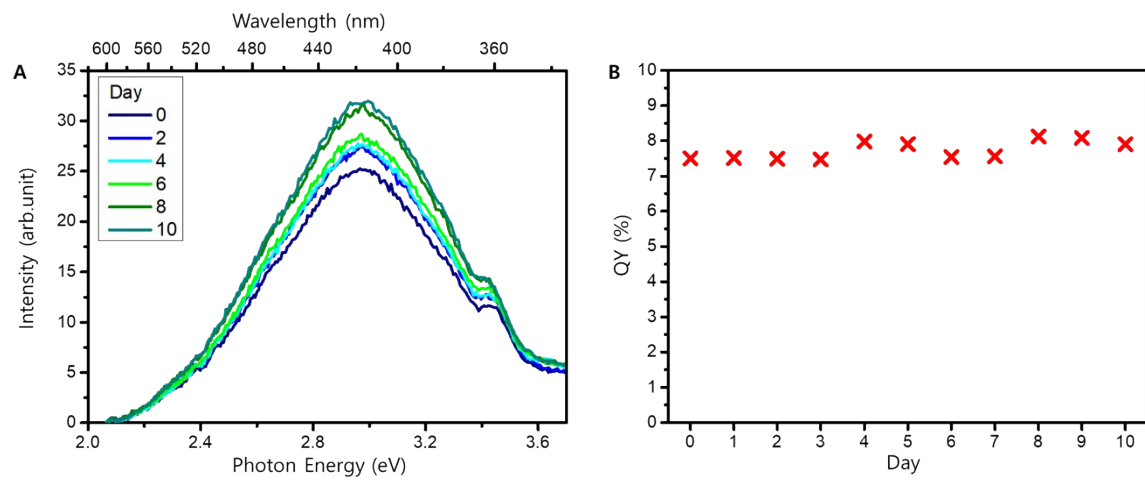

**Figure S5:** (A) PL intensity and (B) QY of Ti<sub>2</sub>N MQDs in 10 days.

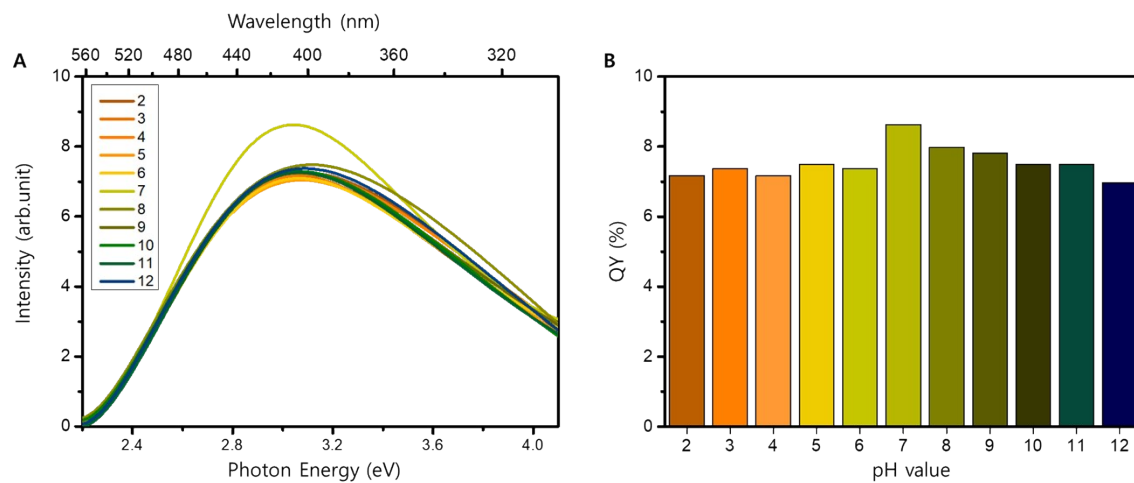

**Figure S6:** (A) PL spectra and (B) QY of Ti<sub>2</sub>N MQDs in different pH condition ranging 2 - 12.



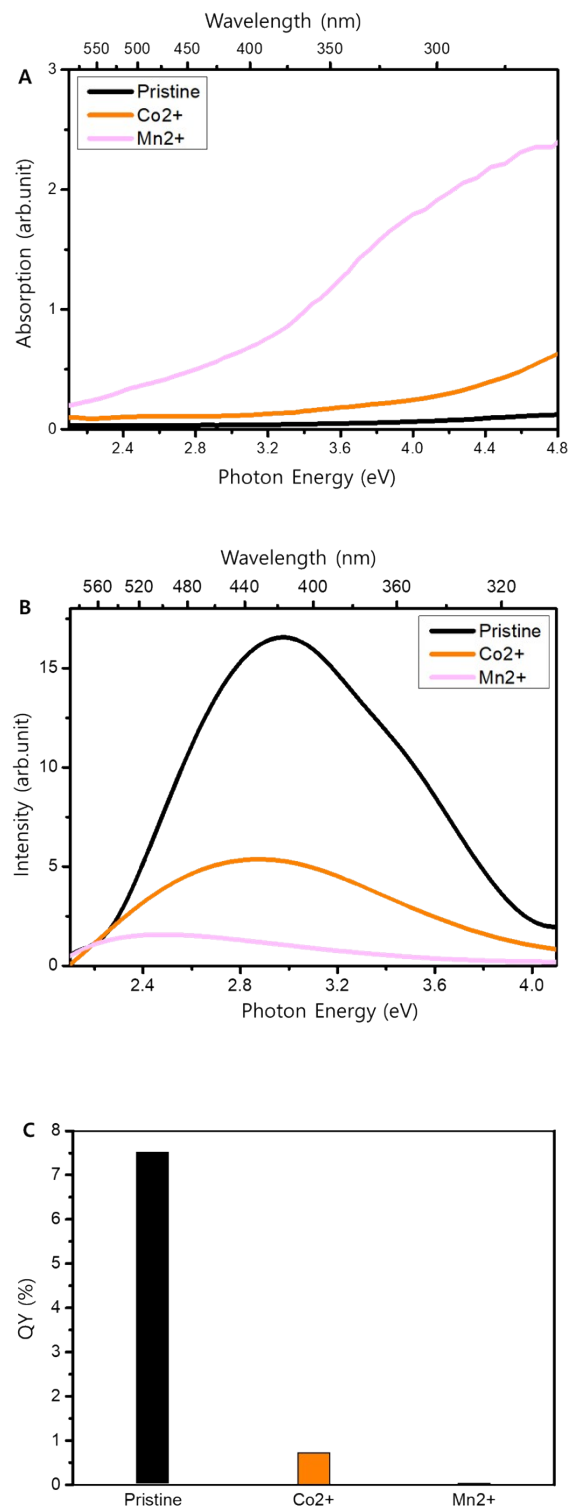

**Figure S7:** (A) UV-Vis absorption spectra, (B) PL spectra and (C) QY of  $\text{Ti}_2\text{N}$  MQDs with the presence of  $\text{Co}^{2+}$  and  $\text{Mn}^{2+}$  ions.

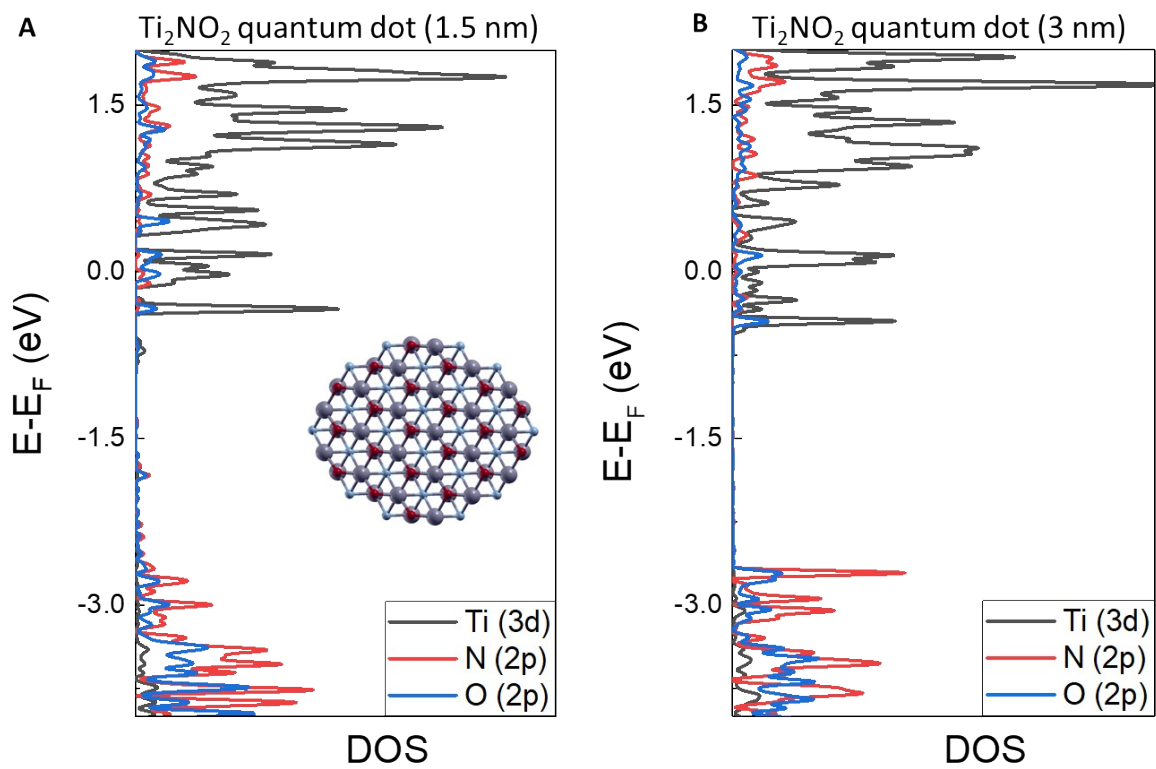

**Figure S8:** DFT calculation of  $\text{Ti}_2\text{NO}_2$  MQDs with sizes of (A) 1.5 nm and (B) 3 nm.

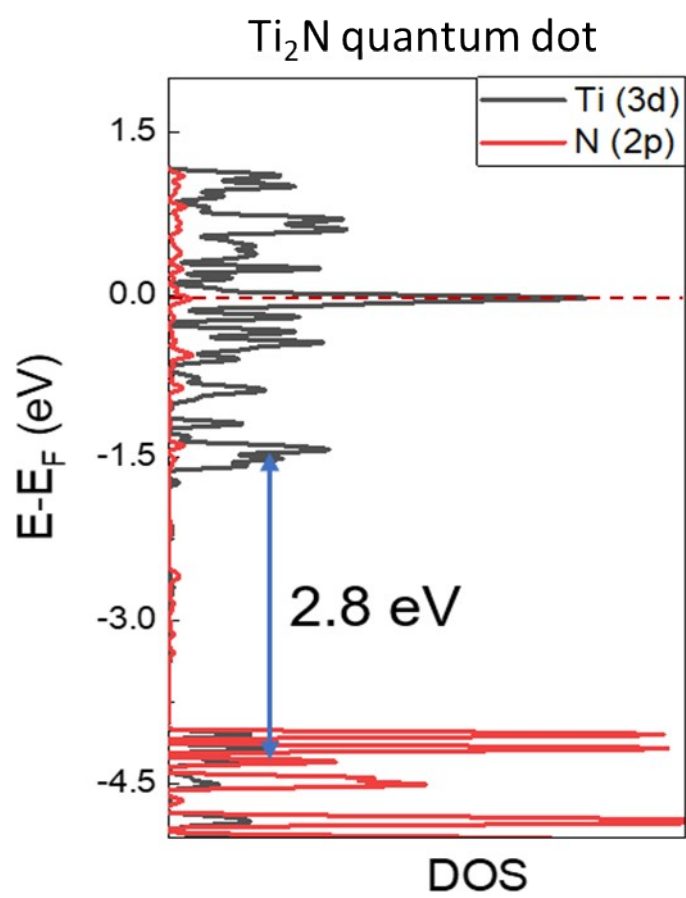

**Figure S9:** DFT calculation of Ti<sub>2</sub>N MQDs.

**Supporting note Figure S3:**

We further confirmed the light-emitting property and PL behavior of thin-film Ti<sub>2</sub>N MQDs for comparison with the PL of the Ti<sub>2</sub>N MQD solution using a 375 nm laser (Figure S3A). The PL showed a redshift of the peak position when the colloidal solution was changed to a solid-state.<sup>1</sup> The PL confocal mapping of the thin film (Figure S3B) was performed using 405 nm laser excitation. The longer wavelength allowed proper observation of the PL of Ti<sub>2</sub>N in solution. By illuminating the blank quartz substrate and thin-film Ti<sub>2</sub>N MQDs using a UV (250 nm) LED, we demonstrated the light-emissive properties of the MQDs (Figures S3C and S3D).

### Supporting note Figure S4: Measurement of Quantum Yield

We measured the absolute quantum yield (QY) of rhodamine 6G (R6G) solution in an integrating sphere and at different excitations using a commercial QY spectrometer. The PL and UV-Vis absorption of R6G and Ti<sub>2</sub>N MQDs were measured under the same conditions, which were then compared to estimate the QY of the MQDs using Equation (1)<sup>2</sup> :

$$\Phi_{\text{MQD}} = \Phi_{\text{ref}} \frac{I_{(\text{MQD})} / A_{(\text{MQD})}}{I_{(\text{ref})} / A_{(\text{ref})}}$$

(1)

where  $\Phi_{\text{MQD}}$  and  $\Phi_{\text{ref}}$  are the QY of the MQDs and reference sample, respectively.  $I_{(\text{MQD})}$  is the PL intensity of the MQDs,  $I_{(\text{ref})}$  is the PL intensity of the reference sample, and  $A_{(\text{MQD})}$  and  $A_{(\text{ref})}$  are the absorptions of the MQDs and reference sample, respectively. The QY (%) of Ti<sub>2</sub>N were calculated within the range of 250 to 400 nm wavelength excitation. For this measurement, the R6G solution was used as the reference sample.

## References

- 1 T. E. Saraswati, U. H. Setiawan, M. R. Ihsan, I. Isnaeni and Y. Herbani, *Open Chem.*, 2019, **17**, 1198–1212.
- 2 S. Roy, A. S. Sharbirin, Y. Lee, W. Bin Kim, T. S. Kim, K. Cho, K. Kang, H. S. Jung and J. Kim, *Nanomaterials*, 2020, **10**, 1032.
